# Supplementary material for: Synthesis and Characterization of Iron Bispyridine Bisdicyanamide, Fe[C5H5N]2[N(CN)2]2
Source: MDPI journal article supplement (doi:10.3390/molecules28134886), 2023-06-21
Supplement: s1 [file s1]

# Synthesis and Characterization of Iron Bispyridine Bisdicyanamide, $\text{Fe}[\text{C}_5\text{H}_5\text{N}]_2[\text{N}(\text{CN})_2]_2$

Laura Henrich <sup>1</sup>, Peter C. Müller <sup>1</sup>, Jan Hempelmann <sup>1</sup>, Markus Mann <sup>1,2</sup>, Jan van Leusen <sup>1</sup>, Simon Steinberg <sup>1</sup> and Richard Dronskowski <sup>1,3,\*</sup>

<sup>1</sup> Chair of Solid State and Quantum Chemistry, Institute of Inorganic Chemistry, RWTH Aachen University, 52056 Aachen, Germany. Fax: +49 241 80-92642; Tel: +49 241 80-93642

<sup>2</sup> Institute of Energy and Climate Research (IEK-1) Materials Synthesis and Processing, Forschungszentrum Jülich GmbH, Wilhelm-Johnen-Straße, 52425 Jülich, Germany

<sup>3</sup> Hoffmann Institute of Advanced Materials, Shenzhen Polytechnic, 7098 Liuxian Blvd, Nanshan District, Shenzhen, China

\* Correspondence: drons@HAL9000.ac.rwth-aachen.de

**Table S1.** Data of the single crystal refinement of  $\text{Fe}[\text{C}_5\text{H}_5\text{N}]_2[\text{N}(\text{CN})_2]_2$ .

|                                                                             |                                          |
|-----------------------------------------------------------------------------|------------------------------------------|
| Chemical formula                                                            | $\text{FeC}_{14}\text{N}_8\text{H}_{10}$ |
| Formula weight (g/mol)                                                      | 346.15                                   |
| Crystal system                                                              | monoclinic                               |
| Space group (no.)                                                           | $I2/m$ (12)                              |
| Temperature (K)                                                             | 100(2)                                   |
| $a$ (Å)                                                                     | 7.453(7)                                 |
| $b$ (Å)                                                                     | 13.167(13)                               |
| $c$ (Å)                                                                     | 8.522(6)                                 |
| $\beta$ (°)                                                                 | 114.98(6)                                |
| $V$ (Å <sup>3</sup> )                                                       | 758.1(12)                                |
| $Z$                                                                         | 2                                        |
| Crystal shape and color                                                     | brown-beige block                        |
| $\rho_{\text{calc}}$ (g·cm <sup>-3</sup> )                                  | 1.516                                    |
| Radiation, $\lambda$ (Å)                                                    | Mo-K $\alpha_1$ , 0.71073                |
| Diffractometer                                                              | Bruker APEX CCD                          |
| Absorption correction                                                       | Multi-scan, SADABS 2014/5                |
| $T_{\text{min}}, T_{\text{max}}$                                            | 0.4236, 0.7461                           |
| No. of measured, independent, and observed [ $I > 2\sigma(I)$ ] reflections | 5814, 1159, 676                          |
| $R_1$                                                                       | 15.29%                                   |
| $R_{1\text{obs}}$                                                           | 7.42%                                    |
| $R_{\text{all}}$                                                            | 17.08%                                   |
| $R_{1\text{all}}$                                                           | 14.45%                                   |
| GOF <sub>obs</sub>                                                          | 1.057                                    |
| No. of parameters, restraint, constraints                                   | 58, 0, 3                                 |
| H-atom treatment                                                            | Constrained refinement                   |

**Table S2.** Data of Rietveld Refinement of powderous [C<sub>5</sub>H<sub>5</sub>N]<sub>2</sub>[N(CN)<sub>2</sub>]<sub>2</sub> sample shown in Figure 2.

|                            |                                                  |                                            |                                            |
|----------------------------|--------------------------------------------------|--------------------------------------------|--------------------------------------------|
| Chemical formula           | FeC <sub>14</sub> N <sub>8</sub> H <sub>10</sub> | $\rho_{\text{calc}}$ (g·cm <sup>-3</sup> ) | 1.479                                      |
| Formula weight             | 346.15                                           | Radiation, $\lambda$ (Å)                   | Mo-K $\alpha_1$ , 0.71073                  |
| Crystal System             | monoclinic                                       | Profile function                           | pseudo-Voigt w. axial divergence asymmetry |
| Space group (No.)          | <i>I</i> 2/ <i>m</i> (12)                        | <i>U</i>                                   | 5.616(38)                                  |
| Temperature (K)            | 300                                              | <i>V</i>                                   | −0.675(16)                                 |
| <i>a</i> (Å)               | 7.437(99)                                        | <i>W</i>                                   | 0.022(38)                                  |
| <i>b</i> (Å)               | 13.300(82)                                       | <i>S<sub>L</sub>/S<sub>D</sub></i>         | 0.027(3)                                   |
| <i>c</i> (Å)               | 8.652(34)                                        | $\eta$                                     | 1.0                                        |
| $\beta$ (°)                | 114.68(1)                                        | <i>R<sub>p</sub></i> (%)                   | 4.34                                       |
| <i>V</i> (Å <sup>3</sup> ) | 777.36(17)                                       | <i>R<sub>wp</sub></i> (%)                  | 2.16                                       |
| <i>Z</i>                   | 2                                                | <i>X</i> <sup>2</sup>                      | 12.9                                       |

**Table S3.** Atomic positions from single crystal refinement.

| Atom | Site       | <i>x</i>   | <i>y</i>  | <i>z</i>  |
|------|------------|------------|-----------|-----------|
| Fe1  | 2 <i>a</i> | 0          | 0         | 0         |
| N1   | 4 <i>i</i> | 0.1390(6)  | 0         | 0.2837(6) |
| N2   | 8 <i>j</i> | 0.2083(5)  | 0.1147(3) | 0.9998(4) |
| N3   | 4 <i>h</i> | ½          | 0.2015(4) | 0         |
| C1   | 8 <i>j</i> | 0.1869(10) | 0.0842(4) | 0.3740(6) |
| C2   | 8 <i>j</i> | 0.2840(11) | 0.0866(5) | 0.5525(7) |
| C3   | 4 <i>i</i> | 0.3363(9)  | 0         | 0.6439(8) |
| C4   | 8 <i>j</i> | 0.3483(6)  | 0.1515(3) | 0.9998(5) |
| H1   | 8 <i>j</i> | 0.1530     | 0.1470    | 0.3136    |
| H2   | 8 <i>j</i> | 0.3141     | 0.1500    | 0.6110    |
| H3   | 4 <i>i</i> | 0.4063     | 0         | 0.7665    |

**Table S4.** Anisotropic displacement parameters for iron, carbon and nitrogen and isotropic displacement parameters for hydrogen in 1 from single crystal refinement.

| Atom                    | <i>U</i> <sub>11</sub> | <i>U</i> <sub>22</sub> | <i>U</i> <sub>33</sub> | <i>U</i> <sub>12</sub> | <i>U</i> <sub>13</sub> | <i>U</i> <sub>23</sub> |
|-------------------------|------------------------|------------------------|------------------------|------------------------|------------------------|------------------------|
| Fe1                     | 0.0145(6)              | 0.0243(7)              | 0.0210(7)              | 0                      | 0.0090(5)              | 0                      |
| N1                      | 0.018(2)               | 0.024(3)               | 0.024(3)               | 0                      | 0.010(2)               | 0                      |
| N2                      | 0.023(2)               | 0.029(2)               | 0.027(2)               | 0.0057(15)             | 0.0097(17)             | 0.0016(15)             |
| N3                      | 0.029(3)               | 0.012(3)               | 0.069(4)               | 0                      | 0.033(3)               | 0                      |
| C1                      | 0.114(5)               | 0.030(3)               | 0.023(3)               | −0.003(2)              | −0.004(3)              | 0.034(3)               |
| C2                      | 0.138(7)               | 0.037(4)               | 0.029(3)               | −0.011(3)              | 0.000(3)               | 0.040(4)               |
| C3                      | 0.023(3)               | 0.040(4)               | 0.027(3)               | 0                      | 0.009(3)               | 0                      |
| C4                      | 0.024(2)               | 0.016(2)               | 0.022(2)               | 0.0011(16)             | 0.0097(18)             | 0.0056(16)             |
| <i>U</i> <sub>iso</sub> |                        |                        |                        |                        |                        |                        |
| H1                      | 0.080                  |                        |                        |                        |                        |                        |
| H2                      | 0.096                  |                        |                        |                        |                        |                        |
| H3                      | 0.037                  |                        |                        |                        |                        |                        |

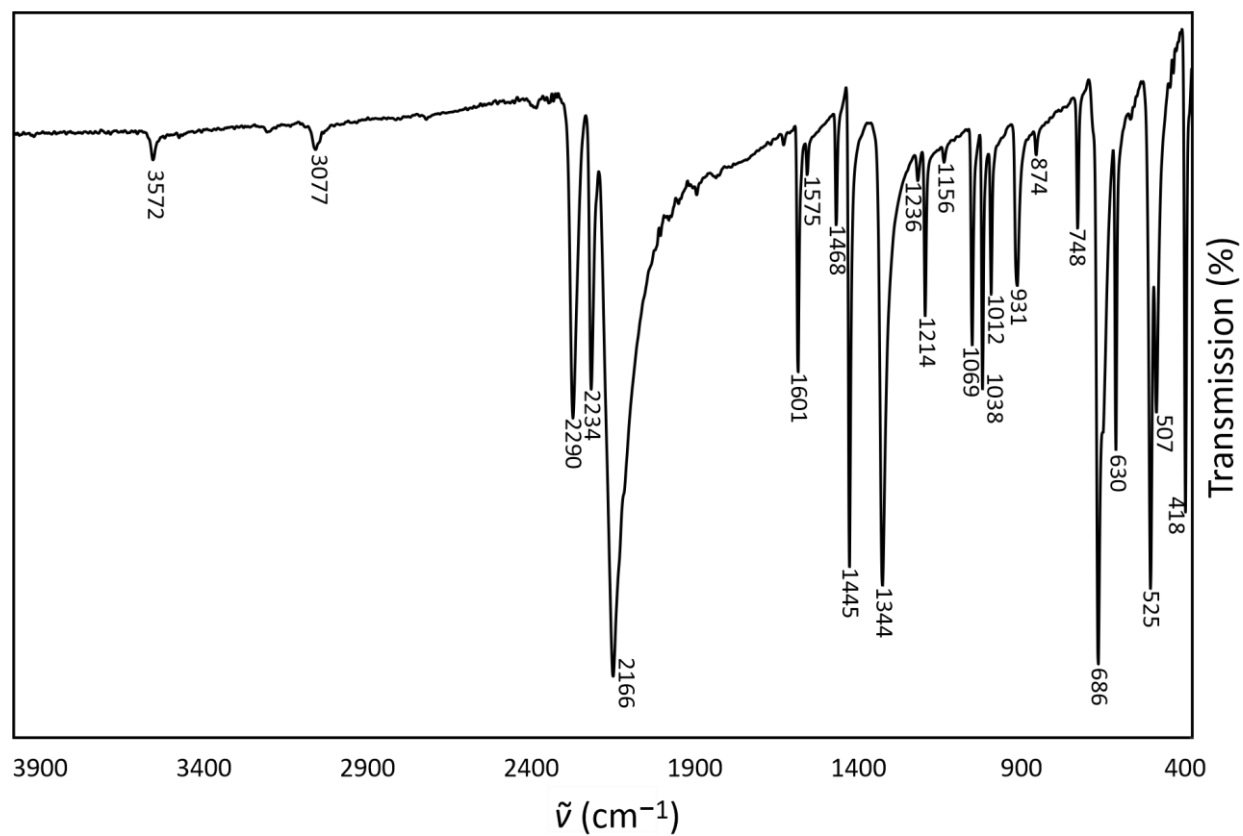

**Figure S1.** ATR-IR measurement of **1** between 4000 and 400  $\text{cm}^{-1}$ .

Table S5. ATR-IR for **1** with all assigned vibrations below 2500 cm<sup>-1</sup>.

| $\tilde{\nu}$ (cm <sup>-1</sup> ) measured | $\tilde{\nu}$ (cm <sup>-1</sup> ) calculated | $\tilde{\nu}$ (cm <sup>-1</sup> ) Fe[N(CN) <sub>2</sub> ] <sub>2</sub> calculated | $\tilde{\nu}$ (cm <sup>-1</sup> ) Pyridine calculated | Vibration                                                                    |
|--------------------------------------------|----------------------------------------------|-----------------------------------------------------------------------------------|-------------------------------------------------------|------------------------------------------------------------------------------|
| 418                                        | 420                                          | 435                                                                               | 404                                                   | $\gamma_s(\text{C-C}) + \nu(\text{Fe-N}) + \nu(\text{NC-N-CN})$              |
| 507/525                                    | 490/505                                      | 470                                                                               | -                                                     | $\sigma_{as}(\text{N-C}\equiv\text{N})$                                      |
| 630/686                                    | 625/685                                      | 665                                                                               | -                                                     | $\delta_s(\text{C-C})$                                                       |
| 748                                        | 745                                          | -                                                                                 | 702/748                                               | $\delta_s(\text{C-H})$                                                       |
| 874*                                       | -                                            | -                                                                                 | -                                                     | $\gamma_s(\text{C-C}) + \nu(\text{Fe-N}) + \nu(\text{NC-N-CN})$              |
| 931                                        | 925                                          | 955                                                                               | 910                                                   | $\nu_s(\text{N-C})$                                                          |
| 1012                                       | 1010                                         | -                                                                                 | 986                                                   | $\delta_{as}(\text{C-C})$                                                    |
| 1038                                       | 1035                                         | -                                                                                 | 1045                                                  | $\delta_s(\text{C-H})$                                                       |
| 1069                                       | 1070                                         | -                                                                                 | 1057                                                  | $\sigma_{as}(\text{N-C}\equiv\text{N}) + \sigma_s(\text{N-C}\equiv\text{N})$ |
| 1154*                                      | -                                            | -                                                                                 | -                                                     | $\delta_s(\text{C-C})$                                                       |
| 1214                                       | 1201                                         | -                                                                                 | 1174                                                  | $\delta_{as}(\text{C-H})$                                                    |
| 1234*                                      | -                                            | -                                                                                 | -                                                     | $\delta(\text{C-C})$                                                         |
| 1344                                       | 1331                                         | 1310                                                                              | -                                                     | $\nu_{as}(\text{N-C})$                                                       |
| 1445/1469/1601                             | 1435/1465/1596                               | -                                                                                 | 1411/1452/1583                                        | $\nu_s(\text{C-C})$                                                          |
| 1574*                                      | -                                            | -                                                                                 | -                                                     | $\gamma_s(\text{C-H})$                                                       |
| 1647*                                      | -                                            | -                                                                                 | -                                                     | $\nu_s(\text{N-C})$                                                          |
| 2166*                                      | -                                            | -                                                                                 | -                                                     | $\sigma_{as}(\text{N-C}\equiv\text{N}) + \sigma_s(\text{N-C}\equiv\text{N})$ |
| 2234                                       | -                                            | 2275                                                                              | -                                                     | $\nu_{as}(\text{N-C}) + \nu_s(\text{N-C})$                                   |
| 2290                                       | 2239/2280                                    | 2305                                                                              | -                                                     | $\nu_s(\text{N}\equiv\text{C})$                                              |
| 2409*                                      | -                                            | -                                                                                 | -                                                     | $\delta_{as}(\text{C-H})$                                                    |

\*Overtone, cannot be calculated by DFT.
